# Supplementary material for: Dietary characterization of terrestrial mammals
Source: PubMed Central journal article supplement (PMC4100522; doi:10.1098/rspb.2014.1173), 2014-08-22
Supplement: rspb20141173supp1.pdf [file rspb20141173supp1.pdf]

## ELECTRONIC SUPPLEMENTARY MATERIAL 1

**Table 1:** Summary of stomach content data for the 139 mammalian species analyzed in this study. U=Unspecified.

| Order        | Family      | Species                 | References                     | % Seeds | % Invertebrates | % Fungi | % Vertebrates | % Flowers-Gum | % Roots-Tubers | % Green Plants | % Fruit | Sample size |
|--------------|-------------|-------------------------|--------------------------------|---------|-----------------|---------|---------------|---------------|----------------|----------------|---------|-------------|
| Artiodactyla | Bovidae     | Aepyceros melampus      | Dunham 1980                    | 0.00    | 0.00            | 0.00    | 0.00          | 0.00          | 0.00           | 100.00         | 0.00    | 1737        |
| Artiodactyla | Bovidae     | Ammotragus lervia       | Gray and Simpson 1980          | 0.00    | 0.00            | 0.00    | 0.00          | 0.00          | 0.00           | 100.00         | 0.00    | 109         |
| Artiodactyla | Bovidae     | Antidorcas marsupialis  | Davies et al. 1986             | 0.00    | 0.00            | 0.00    | 0.00          | 0.00          | 0.00           | 98.50          | 1.50    | U           |
| Artiodactyla | Bovidae     | Cephalophus callipygus  | Gautier-Hion et al. 1980       | 0.00    | 0.00            | 0.10    | 0.00          | 0.90          | 0.00           | 16.30          | 82.70   | 14          |
| Artiodactyla | Bovidae     | Cephalophus dorsalis    | Gautier-Hion et al. 1980       | 0.00    | 0.10            | 0.10    | 0.00          | 0.40          | 0.00           | 26.57          | 72.83   | 8           |
| Artiodactyla | Bovidae     | Cephalophus leucogaster | Gautier-Hion et al. 1980       | 0.00    | 0.10            | 0.10    | 0.00          | 2.20          | 0.00           | 24.70          | 72.90   | 9           |
| Artiodactyla | Bovidae     | Cephalophus nigrifrons  | Gautier-Hion et al. 1980       | 0.00    | 0.10            | 0.40    | 0.00          | 0.20          | 0.00           | 27.70          | 71.60   | 7           |
| Artiodactyla | Bovidae     | Cephalophus silvicultor | Gautier-Hion et al. 1980       | 0.00    | 0.10            | 0.00    | 0.00          | 0.00          | 0.00           | 28.60          | 71.30   | 4           |
| Artiodactyla | Bovidae     | Hyemoschus aquaticus    | Gautier-Hion et al. 1980       | 0.00    | 0.20            | 0.70    | 0.00          | 0.10          | 0.00           | 30.37          | 68.63   | 19          |
| Artiodactyla | Bovidae     | Philantomba monticola   | Gautier-Hion et al. 1980       | 0.00    | 0.50            | 0.20    | 0.00          | 0.60          | 0.00           | 20.28          | 78.42   | 16          |
| Artiodactyla | Bovidae     | Tragelaphus spekii      | Gautier-Hion et al. 1980       | 0.00    | 0.00            | 0.00    | 0.00          | 0.00          | 0.00           | 99.90          | 0.10    | 3           |
| Artiodactyla | Tayassuidae | Tayassu pecari          | Sowls 1997                     | 0.00    | 0.00            | 0.00    | 0.00          | 0.00          | 0.00           | 39.00          | 61.00   | 34          |
| Carnivora    | Canidae     | Canis lupus dingo       | Newsome et al. 1983            | 0.00    | 0.00            | 0.00    | 100.00        | 0.00          | 0.00           | 0.00           | 0.00    | 230         |
| Carnivora    | Canidae     | Canis mesomelas         | Bothma 1966                    | 0.00    | 68.40           | 0.00    | 29.20         | 0.00          | 0.00           | 1.80           | 0.60    | 11          |
| Carnivora    | Canidae     | Otocyon megalotis       | Bothma 1966, Klare et al. 2011 | 0.00    | 56.72           | 0.00    | 0.90          | 0.00          | 0.00           | 26.82          | 15.55   | 185         |

|               |                 |                                 |                                              |       |        |      |        |      |      |        |       |     |
|---------------|-----------------|---------------------------------|----------------------------------------------|-------|--------|------|--------|------|------|--------|-------|-----|
| Carnivora     | Canidae         | <i>Urocyon cinereoargenteus</i> | Hockman and Chapman 1983                     | 31.11 | 3.65   | 0.00 | 45.93  | 0.00 | 0.00 | 1.25   | 18.06 | 63  |
| Carnivora     | Canidae         | <i>Vulpes lagopus</i>           | Anthony et al. 2000                          | 0.00  | 0.00   | 0.00 | 100.00 | 0.00 | 0.00 | 0.00   | 0.00  | 100 |
| Carnivora     | Canidae         | <i>Vulpes vulpes</i>            | Hockman and Chapman 1983                     | 1.36  | 0.94   | 0.00 | 84.34  | 0.00 | 0.00 | 0.00   | 13.36 | 128 |
| Carnivora     | Herpestidae     | <i>Helogale hirtula</i>         | Hemming 1972                                 | 0.00  | 100.00 | 0.00 | 0.00   | 0.00 | 0.00 | 0.00   | 0.00  | 5   |
| Carnivora     | Mustelidae      | <i>Galictis vittata</i>         | Bisbal E. 1986                               | 0.00  | 0.00   | 0.00 | 100.00 | 0.00 | 0.00 | 0.00   | 0.00  | U   |
| Carnivora     | mustelidae      | <i>Martes martes</i>            | Ruiz-Olmo 1996                               | 0.00  | 0.10   | 0.00 | 53.90  | 0.00 | 0.00 | 0.00   | 46.00 | 42  |
| Carnivora     | Mustelidae      | <i>Meles meles</i>              | Cleary et al. 2011                           | 4.47  | 17.10  | 0.00 | 7.06   | 0.00 | 0.00 | 70.87  | 0.49  | 281 |
| Carnivora     | Nandinidae      | <i>Nandinia binotata</i>        | McNab 1995                                   | 0.00  | 10.00  | 0.00 | 0.00   | 0.00 | 0.00 | 0.00   | 90.00 | U   |
| Carnivora     | Procyonidae     | <i>Procyon lotor</i>            | Baker et al. 1945                            | 67.00 | 25.00  | 0.00 | 4.00   | 0.00 | 0.00 | 0.00   | 4.00  | 23  |
| Carnivora     | Ursidae         | <i>Ursus arctos</i>             | Sato et al. 2005                             | 13.22 | 6.81   | 0.00 | 7.85   | 0.00 | 0.18 | 56.32  | 15.62 | 532 |
| Diprotodontia | Burramyidae     | <i>Cercartetus caudatus</i>     | Flannery and Schouten 1994                   | 0.00  | 100.00 | 0.00 | 0.00   | 0.00 | 0.00 | 0.00   | 0.00  | U   |
| Diprotodontia | Macropodidae    | <i>Thylogale stigmatica</i>     | Vernes 1995                                  | 0.00  | 0.00   | 0.00 | 0.00   | 0.00 | 0.00 | 100.00 | 0.00  | 16  |
| Eulipotyphla  | Chrysochloridae | <i>Eremitalpa granti</i>        | Fielden et al. 1990, Perrin and Fielden 1999 | 0.00  | 93.00  | 0.00 | 0.00   | 0.00 | 7.00 | 0.00   | 0.00  | 19  |
| Eulipotyphla  | Soricidae       | <i>Blarina brevicauda</i>       | Hahus and Smith 1990                         | 0.65  | 96.80  | 0.00 | 0.00   | 0.00 | 0.00 | 2.55   | 0.00  |     |
| Eulipotyphla  | Soricidae       | <i>Crocidura cyanea</i>         | Monadjem 1997                                | 0.00  | 100.00 | 0.00 | 0.00   | 0.00 | 0.00 | 0.00   | 0.00  | 23  |
| Eulipotyphla  | Soricidae       | <i>Crocidura flavecens</i>      | Monadjem 1997                                | 0.00  | 93.30  | 0.00 | 0.00   | 0.00 | 0.00 | 6.70   | 0.00  | 5   |
| Eulipotyphla  | Soricidae       | <i>Crocidura mariquensis</i>    | Monadjem 1997                                | 0.00  | 100.00 | 0.00 | 0.00   | 0.00 | 0.00 | 0.00   | 0.00  | U   |
| Eulipotyphla  | Soricidae       | <i>Myosorex cafer</i>           | Monadjem 1997                                | 0.00  | 74.80  | 0.00 | 0.00   | 0.00 | 0.00 | 25.20  | 0.00  | 7   |
| Eulipotyphla  | Soricidae       | <i>Myosorex varius</i>          | Monadjem 1997                                | 0.00  | 97.10  | 0.00 | 0.00   | 0.00 | 0.00 | 2.90   | 0.00  | U   |
| Eulipotyphla  | Soricidae       | <i>Sorex fumeus</i>             | Owen 1984                                    | 0.00  | 99.00  | 0.00 | 0.00   | 0.00 | 0.00 | 1.00   | 0.00  | 4   |

|                  |                   |                             |                                              |      |        |      |      |      |       |       |       |     |
|------------------|-------------------|-----------------------------|----------------------------------------------|------|--------|------|------|------|-------|-------|-------|-----|
| Eulipotyphla     | Soricidae         | Sorex hoyi                  | Long 1974                                    | 0.00 | 100.00 | 0.00 | 0.00 | 0.00 | 0.00  | 0.00  | 0.00  | 10  |
| Eulipotyphla     | Soricidae         | Sorex palustris             | Beneski and Stinson 1987                     | 0.00 | 87.00  | 0.00 | 0.00 | 0.00 | 0.00  | 13.00 | 0.00  | U   |
| Eulipotyphla     | Talpidae          | Parascalops breweri         | Hallett 1978                                 | 0.00 | 84.00  | 0.00 | 0.00 | 0.00 | 2.00  | 14.00 | 0.00  | U   |
| Eulipotyphla     | Talpidae          | Scapanus townsendii         | Carraway et al. 1993                         | 1.91 | 72.46  | 0.00 | 0.59 | 0.00 | 18.41 | 6.64  | 0.00  | 100 |
| Eulipotyphla     | Talpidae          | Talpa europaea              | Funmilayo 1979                               | 0.00 | 100.00 | 0.00 | 0.00 | 0.00 | 0.00  | 0.00  | 0.00  | 252 |
| Macroscelidea    | Macroscelidae     | Elephantulus brachyrhynchus | Koontz and Roeper 1983,<br>Leirs et al. 1995 | 0.00 | 100.00 | 0.00 | 0.00 | 0.00 | 0.00  | 0.00  | 0.00  | U   |
| Macroscelidea    | Macroscelidae     | Elephantulus rufescens      | Hemming 1972                                 | 0.30 | 63.00  | 0.00 | 0.00 | 0.00 | 0.00  | 36.70 | 0.00  | 23  |
| Macroscelidea    | Macroscelidae     | Macroscelides proboscideus  | Kerley 1992                                  | 0.00 | 98.00  | 0.00 | 0.00 | 0.00 | 0.00  | 1.00  | 1.00  | 7   |
| Microbiotheria   | Microbiotheriidae | Dromiciops gliroides        | Meserve et al. 1988                          | 4.96 | 71.63  | 2.23 | 0.00 | 0.10 | 0.00  | 18.64 | 2.43  | 71  |
| Paucituberculata | Caenolestidae     | Caenolestes fuliginosus     | Barkley and Whitaker 1984                    | 0.00 | 96.90  | 0.00 | 2.50 | 0.00 | 0.00  | 0.60  | 0.00  | 38  |
| Paucituberculata | Caenolestidae     | Rhyncholestes raphanurus    | Meserve 1981                                 | 3.84 | 54.60  | 7.99 | 0.00 | 0.51 | 0.00  | 31.75 | 1.31  | 11  |
| Pholidota        | Manidae           | Manis crassicaudata         | Heath 1995                                   | 0.00 | 100.00 | 0.00 | 0.00 | 0.00 | 0.00  | 0.00  | 0.00  | 31  |
| Primates         | Atelidae          | Alouatta seniculus          | Guillotin et al. 1994                        | 0.00 | 0.11   | 0.12 | 0.00 | 0.35 | 0.00  | 53.67 | 45.75 | U   |
| Primates         | Atelidae          | Ateles paniscus             | Guillotin et al. 1994                        | 0.00 | 0.08   | 0.00 | 0.08 | 0.00 | 0.00  | 9.60  | 90.24 | 60  |
| Primates         | Cebidae           | Cebus apella                | Guillotin et al. 1994                        | 0.00 | 26.74  | 0.00 | 0.19 | 0.04 | 0.00  | 4.75  | 68.28 | 44  |
| Primates         | Cercopithecidae   | Cercocebus agilis           | Gautier-Hion et al. 1980                     | 0.00 | 6.10   | 0.00 | 0.00 | 5.10 | 0.00  | 6.10  | 82.70 | 97  |
| Primates         | Cercopithecidae   | Cercopithecus cephus        | Gautier-Hion et al. 1980                     | 0.00 | 12.60  | 0.00 | 0.00 | 0.00 | 0.00  | 6.10  | 81.30 | 15  |
| Primates         | Cercopithecidae   | Cercopithecus neglectus     | Gautier-Hion et al. 1980                     | 0.00 | 4.90   | 5.40 | 0.00 | 3.00 | 0.00  | 9.40  | 77.30 | 62  |
| Primates         | Cercopithecidae   | Cercopithecus nictitans     | Gautier-Hion et al. 1980                     | 0.00 | 9.60   | 0.40 | 0.00 | 1.00 | 0.00  | 17.00 | 72.00 | 9   |
| Primates         | Cercopithecidae   | Cercopithecus pogonias      | Gautier-Hion et al. 1980                     | 0.00 | 16.10  | 0.10 | 0.00 | 0.10 | 0.00  | 1.20  | 82.50 | 100 |

|             |                 |                         |                          |       |       |       |      |       |      |       |       |      |
|-------------|-----------------|-------------------------|--------------------------|-------|-------|-------|------|-------|------|-------|-------|------|
| Primates    | Cercopithecidae | Colobus guereza         | Gautier-Hion et al. 1980 | 0.00  | 0.10  | 0.00  | 0.00 | 0.00  | 0.00 | 50.80 | 49.10 | 52   |
| Primates    | Cercopithecidae | Mandrillus sphinx       | Gautier-Hion et al. 1980 | 0.00  | 4.00  | 1.00  | 0.00 | 0.00  | 0.00 | 3.00  | 92.00 | 5    |
| Primates    | Cercopithecidae | Miopithecus talapoin    | Gautier-Hion et al. 1980 | 0.00  | 36.20 | 0.00  | 0.00 | 1.50  | 0.00 | 2.00  | 60.30 | U    |
| Primates    | Galagidae       | Euoticus elegantulus    | Charles-Dominique 1974   | 0.00  | 20.00 | 0.00  | 0.00 | 75.00 | 0.00 | 0.00  | 5.00  | 9    |
| Primates    | Galagidae       | Galago alleni           | Charles-Dominique 1974   | 0.00  | 23.47 | 0.00  | 2.04 | 0.00  | 0.00 | 0.00  | 74.49 | 52   |
| Primates    | Galagidae       | Galago demidoff         | Charles-Dominique 1974   | 0.00  | 70.71 | 0.00  | 0.00 | 10.10 | 0.00 | 0.00  | 19.19 | 12   |
| Primates    | Lorisidae       | Arctocebus calabarensis | Charles-Dominique 1974   | 0.00  | 85.86 | 0.00  | 0.00 | 0.00  | 0.00 | 0.00  | 14.14 | 55   |
| Primates    | Lorisidae       | Perodictus potto        | Charles-Dominique 1974   | 0.00  | 10.42 | 0.00  | 0.00 | 21.88 | 0.00 | 0.00  | 67.71 | 14   |
| Proboscidea | Elephantidae    | Loxodonta africana      | Buss 1961                | 0.00  | 0.00  | 0.00  | 0.00 | 0.00  | 0.00 | 96.00 | 4.00  | 41   |
| Rodentia    | Heteromyidae    | Chaetodipus baileyi     | Reichman 1975            | 88.10 | 8.90  | 0.00  | 0.00 | 0.00  | 0.00 | 3.00  | 0.00  | 71   |
| Rodentia    | Heteromyidae    | Chaetodipus intermedius | Reichman 1975            | 82.40 | 16.20 | 0.00  | 0.00 | 0.00  | 0.00 | 1.40  | 0.00  | 330  |
| Rodentia    | Heteromyidae    | Dipodomys merriami      | Reichman 1975            | 78.40 | 15.50 | 0.00  | 0.00 | 0.00  | 0.00 | 6.10  | 0.00  | 783  |
| Rodentia    | Heteromyidae    | Perognathus amplus      | Reichman 1975            | 94.30 | 3.70  | 0.00  | 0.00 | 0.00  | 0.00 | 2.00  | 0.00  | 1054 |
| Rodentia    | Muridae         | Abrothrix longipilis    | Meserve et al. 1988      | 16.10 | 51.27 | 1.86  | 1.12 | 0.00  | 2.49 | 27.16 | 0.00  | 714  |
| Rodentia    | Muridae         | Abrothrix sanborni      | Meserve et al. 1988      | 4.62  | 37.10 | 25.69 | 0.00 | 0.62  | 0.00 | 29.39 | 2.57  | 5    |
| Rodentia    | Muridae         | Acomys cahirinus        | Hemming 1972             | 42.44 | 7.01  | 0.00  | 0.00 | 0.00  | 0.00 | 32.23 | 18.32 | 55   |
| Rodentia    | Muridae         | Acomys dimidiatus       | Varty 1990               | 53.00 | 13.00 | 0.00  | 0.00 | 3.00  | 0.00 | 31.00 | 0.00  | 17   |
| Rodentia    | Muridae         | Aethomys crisophilus    | Monadjem 1997            | 58.30 | 4.20  | 0.00  | 0.00 | 0.00  | 0.00 | 37.50 | 0.00  | 30   |
| Rodentia    | Muridae         | Akodon azarae           | Ellis et al. 1998        | 33.92 | 53.18 | 0.00  | 0.00 | 0.00  | 0.00 | 12.90 | 0.00  | 10   |
| Rodentia    | Muridae         | Arvicanthis niloticus   | Hemming 1972             | 0.00  | 0.10  | 0.00  | 0.00 | 0.00  | 0.00 | 99.90 | 0.00  | 81   |

|          |         |                          |                             |       |       |       |      |       |      |        |       |     |
|----------|---------|--------------------------|-----------------------------|-------|-------|-------|------|-------|------|--------|-------|-----|
| Rodentia | Muridae | Calomys laucha           | Ellis et al. 1998           | 59.62 | 27.84 | 0.00  | 0.00 | 0.00  | 0.00 | 12.54  | 0.00  | 22  |
| Rodentia | Muridae | Calomys musculinus       | Ellis et al. 1998           | 57.08 | 27.32 | 0.00  | 0.00 | 0.00  | 0.00 | 15.60  | 0.00  | 139 |
| Rodentia | Muridae | Geoxus valdivianus       | Meserve et al. 1988         | 1.91  | 55.87 | 8.12  | 0.00 | 0.20  | 0.00 | 33.90  | 0.00  | 141 |
| Rodentia | Muridae | Gerbilliscus leucogaster | Monadjem 1997               | 25.50 | 24.90 | 0.00  | 0.00 | 0.00  | 0.00 | 49.60  | 0.00  | 18  |
| Rodentia | Muridae | Gerbilliscus robustus    | Hemming 1972                | 25.93 | 14.21 | 0.00  | 0.00 | 6.41  | 0.00 | 27.33  | 26.13 | 5   |
| Rodentia | Muridae | Gerbillurus paeba        | Perrin et al. 1999          | 0.00  | 8.41  | 0.00  | 0.00 | 0.00  | 0.00 | 91.59  | 0.00  | 4   |
| Rodentia | Muridae | Grammomys dolichurus     | Varty 1990                  | 56.00 | 2.00  | 7.00  | 0.00 | 0.00  | 0.00 | 35.00  | 0.00  | 42  |
| Rodentia | Muridae | Irenomys tarsalis        | Meserve et al. 1988         | 28.50 | 2.38  | 3.21  | 0.00 | 7.56  | 0.00 | 40.83  | 17.51 | 8   |
| Rodentia | Muridae | Lemniscomys rosalia      | Monadjem 1997               | 15.40 | 0.00  | 0.00  | 0.00 | 0.00  | 0.00 | 84.60  | 0.00  | 10  |
| Rodentia | Muridae | Lorentzimys nouhuysi     | Jackson 1992                | 0.00  | 38.88 | 21.28 | 0.00 | 0.00  | 0.00 | 39.85  | 0.00  | 9   |
| Rodentia | Muridae | Loxodontomys micropus    | Meserve et al. 1988         | 19.37 | 2.75  | 5.81  | 0.00 | 19.47 | 0.00 | 24.57  | 28.03 | 58  |
| Rodentia | Muridae | Mastomys natalensis      | Langham 1983, Monadjem 1997 | 47.00 | 9.50  | 0.00  | 0.00 | 0.00  | 0.00 | 43.50  | 0.00  | 16  |
| Rodentia | Muridae | Maxomys surifer          | Monadjem 1997               | 0.00  | 40.94 | 0.00  | 0.00 | 0.00  | 0.00 | 52.57  | 6.49  | 59  |
| Rodentia | Muridae | Micaelamys namaquensis   | Langham 1983                | 40.20 | 0.00  | 0.00  | 0.00 | 0.00  | 0.00 | 59.80  | 0.00  | 45  |
| Rodentia | Muridae | Microtus ochrogaster     | Hahus and Smith 1990        | 1.15  | 2.65  | 0.00  | 0.00 | 0.00  | 0.00 | 96.20  | 0.00  | 6   |
| Rodentia | Muridae | Mus minutoides           | Langham 1983, Kerley 1992   | 7.61  | 8.81  | 0.00  | 0.00 | 0.00  | 0.00 | 83.58  | 0.00  | 57  |
| Rodentia | Muridae | Myotomys unisulcatus     | Kerley 1992                 | 0.00  | 0.00  | 0.00  | 0.00 | 0.00  | 0.00 | 100.00 | 0.00  | 69  |
| Rodentia | Muridae | Necomys obscurus         | Ellis et al. 1998           | 36.09 | 43.07 | 0.00  | 0.00 | 0.00  | 0.00 | 20.84  | 0.00  | 16  |
| Rodentia | Muridae | Oligoryzomys flavescens  | Ellis et al. 1998           | 47.07 | 41.57 | 0.00  | 0.00 | 0.00  | 0.00 | 11.36  | 0.00  | 43  |
| Rodentia | Muridae | Oryzomys longicaudatus   | Meserve et al. 1988         | 39.02 | 14.27 | 2.44  | 0.00 | 5.00  | 0.00 | 26.46  | 12.80 | 26  |

|          |              |                             |                                     |       |       |       |      |      |      |        |       |     |
|----------|--------------|-----------------------------|-------------------------------------|-------|-------|-------|------|------|------|--------|-------|-----|
| Rodentia | Muridae      | Otomys angoniensis          | Langham 1983                        | 0.00  | 0.00  | 0.00  | 0.00 | 0.00 | 0.00 | 100.00 | 0.00  | 37  |
| Rodentia | Muridae      | Otomys irroratus            | Langham 1983                        | 0.00  | 0.00  | 0.00  | 0.00 | 0.00 | 0.00 | 100.00 | 0.00  | U   |
| Rodentia | Muridae      | Peromyscus attwateri        | Schmidly 1974                       | 60.36 | 31.03 | 0.00  | 0.00 | 0.00 | 2.60 | 1.60   | 4.40  | 5   |
| Rodentia | Muridae      | Peromyscus leucopus         | Whitaker 1966, Hahus and Smith 1990 | 40.02 | 37.31 | 0.23  | 0.40 | 0.00 | 0.00 | 22.04  | 0.00  | U   |
| Rodentia | Muridae      | Phyllotis darwini           | Meserve 1981                        | 41.65 | 2.38  | 0.03  | 3.10 | 0.00 | 0.00 | 52.85  | 0.00  | 27  |
| Rodentia | Muridae      | Pseudohydromys ellemani     | Jackson 1992                        | 0.00  | 61.50 | 15.30 | 0.00 | 0.00 | 0.00 | 23.20  | 0.00  | 147 |
| Rodentia | Muridae      | Pseudohydromys fuscus       | Jackson 1992                        | 0.00  | 52.40 | 21.90 | 0.00 | 0.00 | 0.00 | 25.70  | 0.00  | 9   |
| Rodentia | Muridae      | Pseudohydromys murinus      | Jackson 1992                        | 0.00  | 66.30 | 23.10 | 0.00 | 0.00 | 0.00 | 10.60  | 0.00  | 7   |
| Rodentia | Muridae      | Pseudohydromys occidentalis | Jackson 1992                        | 0.00  | 99.50 | 0.00  | 0.00 | 0.00 | 0.00 | 0.50   | 0.00  | 24  |
| Rodentia | Muridae      | Rattus rattus               | Langham 1983                        | 61.20 | 0.40  | 0.00  | 0.00 | 0.00 | 0.00 | 38.40  | 0.00  | U   |
| Rodentia | Muridae      | Rhabdomys pumilo            | Kerley 1992                         | 32.83 | 5.46  | 0.00  | 0.00 | 0.00 | 0.00 | 61.70  | 0.00  | U   |
| Rodentia | Muridae      | Taterillus harringtoni      | Hemming 1972                        | 24.92 | 2.30  | 0.00  | 0.00 | 3.45 | 0.00 | 26.98  | 42.34 | 101 |
| Rodentia | Nesomyidae   | Dendromus mesomelas         | Langham 1983                        | 87.00 | 1.30  | 0.00  | 0.00 | 0.00 | 0.00 | 11.70  | 0.00  | 27  |
| Rodentia | Nesomyidae   | Dendromus mystacalis        | Langham 1983                        | 39.70 | 16.20 | 0.00  | 0.00 | 0.00 | 0.00 | 44.10  | 0.00  | 5   |
| Rodentia | Nesomyidae   | Malacothrix typica          | Kerley 1992                         | 16.00 | 11.80 | 0.00  | 0.00 | 0.00 | 0.00 | 72.20  | 0.00  | 6   |
| Rodentia | Nesomyidae   | Saccostomus campestris      | Langham 1983                        | 66.70 | 0.00  | 0.00  | 0.00 | 0.00 | 0.00 | 33.30  | 0.00  | 6   |
| Rodentia | Nesomyidae   | Saccostomus mearnsi         | Varty 1990                          | 44.00 | 3.00  | 0.00  | 0.00 | 0.00 | 0.00 | 53.00  | 0.00  | U   |
| Rodentia | Nesomyidae   | Steatomys pratensis         | Langham 1983                        | 38.80 | 0.00  | 0.00  | 0.00 | 0.00 | 0.00 | 61.20  | 0.00  | U   |
| Rodentia | Octodontidae | Ctenomys mendocinus         | Torres-Mura et al. 1989             | 0.00  | 0.00  | 0.00  | 0.00 | 0.00 | 0.00 | 100.00 | 0.00  | U   |
| Rodentia | Octodontidae | Octodon degus               | Meserve et al. 1983                 | 34.07 | 0.42  | 0.00  | 3.39 | 0.00 | 0.00 | 62.11  | 0.00  | U   |

|          |              |                           |                                       |       |       |       |      |       |      |        |       |     |
|----------|--------------|---------------------------|---------------------------------------|-------|-------|-------|------|-------|------|--------|-------|-----|
| Rodentia | Octodontidae | Tympanoctomys barrerae    | Torres-Mura et al. 1989               | 0.00  | 0.00  | 0.00  | 0.00 | 0.00  | 0.00 | 100.00 | 0.00  | 74  |
| Rodentia | Sciuridae    | Callosciurus melanogaster | Whitten 1981                          | 23.71 | 63.92 | 0.00  | 0.00 | 0.00  | 0.00 | 12.37  | 0.00  | U   |
| Rodentia | Sciuridae    | Citellus lateralis        | Tevis 1953                            | 4.33  | 6.00  | 61.33 | 2.00 | 3.33  | 1.00 | 21.67  | 0.33  | 3   |
| Rodentia | Sciuridae    | Cynomys ludovicianus      | Wydeven and Dahlgren 1982             | 0.00  | 0.00  | 0.00  | 0.00 | 0.00  | 0.00 | 100.00 | 0.00  | 273 |
| Rodentia | Sciuridae    | Epixerus ebii             | Emmons 1980, Gautier-Hion et al. 1980 | 0.00  | 1.60  | 0.00  | 0.00 | 0.00  | 0.00 | 0.00   | 98.40 | U   |
| Rodentia | Sciuridae    | Funisciurus anerythrus    | Emmons 1980                           | 0.00  | 19.50 | 0.60  | 0.00 | 0.00  | 0.00 | 3.00   | 76.90 | 8   |
| Rodentia | Sciuridae    | Funisciurus isabella      | Emmons 1980                           | 0.00  | 5.53  | 1.64  | 0.00 | 0.00  | 0.00 | 9.93   | 82.91 | 15  |
| Rodentia | Sciuridae    | Funisciurus lemniscatus   | Emmons 1980                           | 0.00  | 36.76 | 0.10  | 0.00 | 0.00  | 0.00 | 3.16   | 59.98 | 14  |
| Rodentia | Sciuridae    | Funisciurus pyrropus      | Emmons 1980                           | 0.00  | 13.10 | 1.80  | 0.00 | 1.80  | 0.00 | 0.70   | 82.60 | 15  |
| Rodentia | Sciuridae    | Heliosciurus rufobrachium | Emmons 1980                           | 0.00  | 4.53  | 0.00  | 0.00 | 0.20  | 0.00 | 6.24   | 89.03 | 12  |
| Rodentia | Sciuridae    | Lariscus obscurus         | Whitten 1981                          | 71.29 | 21.78 | 0.00  | 0.00 | 0.00  | 0.00 | 6.93   | 0.00  | 15  |
| Rodentia | Sciuridae    | Myosciurus pumilio        | Emmons 1980, Gautier-Hion et al. 1980 | 0.00  | 36.80 | 0.00  | 0.00 | 0.00  | 0.00 | 29.90  | 33.30 | 3   |
| Rodentia | Sciuridae    | Neotamias townsendi       | Tevis 1953                            | 8.00  | 8.00  | 72.33 | 0.00 | 10.00 | 0.00 | 0.00   | 1.67  | 6   |
| Rodentia | Sciuridae    | Paraxeros poensis         | Emmons 1980, Gautier-Hion et al. 1980 | 0.00  | 11.15 | 0.00  | 0.00 | 0.00  | 0.00 | 0.00   | 88.85 | 48  |
| Rodentia | Sciuridae    | Protoxerus stangeri       | Emmons 1980, Gautier-Hion et al. 1980 | 0.00  | 0.31  | 3.30  | 0.00 | 0.00  | 0.00 | 8.94   | 87.44 | 16  |
| Rodentia | Sciuridae    | Sundasciurus lowii        | Whitten 1981                          | 0.00  | 40.21 | 0.00  | 0.00 | 0.00  | 0.00 | 59.79  | 0.00  | 13  |
| Rodentia | Sciuridae    | Tamias amoenus            | Tevis 1953                            | 41.33 | 20.67 | 27.67 | 0.17 | 2.67  | 0.33 | 7.00   | 0.17  | 7   |
| Rodentia | Sciuridae    | Tamias quadrimaculatus    | Tevis 1953                            | 14.33 | 6.67  | 66.00 | 0.33 | 3.67  | 0.00 | 7.33   | 1.67  | 170 |
| Rodentia | Sciuridae    | Tamias speciosus          | Tevis 1953                            | 29.33 | 15.67 | 31.67 | 0.33 | 21.67 | 0.00 | 1.00   | 0.33  | 165 |
| Rodentia | Sciuridae    | Xerus rutilus             | Hemming 1972, O'Shea 1991             | 53.51 | 5.01  | 0.00  | 0.00 | 7.61  | 0.00 | 22.86  | 11.02 | 126 |

|            |             |                           |               |       |       |       |       |      |      |       |       |     |
|------------|-------------|---------------------------|---------------|-------|-------|-------|-------|------|------|-------|-------|-----|
| Rodentia   | Zapodidae   | Napaeozapus insignis      | Whitaker 1963 | 24.00 | 19.00 | 37.00 | 0.00  | 0.00 | 0.00 | 8.00  | 12.00 | 6   |
| Scandentia | Tupaidae    | Tupaia glis               | Langham 1983  | 0.00  | 66.50 | 0.00  | 0.00  | 0.00 | 0.00 | 20.90 | 12.60 | 103 |
| Xenarthra  | Dasypodidae | Chaetophractus vellerosus | Greegor 1980  | 0.00  | 40.68 | 0.00  | 21.35 | 0.00 | 0.00 | 37.96 | 0.00  | 24  |
| Xenarthra  | Dasypodidae | Dasypus novemcinctus      | Whitaker 1963 | 0.00  | 88.93 | 0.00  | 8.58  | 0.00 | 0.00 | 0.00  | 2.50  | 84  |

## REFERENCES

- Anthony, R. M., N. L. Barten, and P. E. Seiser. 2000. Foods of Arctic foxes *Alopex lagopus* during winter and spring in western Alaska. *Journal of Mammalogy* 81:820-828.
- Baker, R. H., C. C. Newman, and F. Wilke. 1945. Food habits of the raccoon in eastern Texas. *Journal of Wildlife Management* 9:45-48.
- Barkley, L. J. and J. O. Whitaker, Jr. 1984. Confirmation of *Caenolestes* in Peru with Information on Diet. *Journal of Mammalogy* 65:328-330.
- Beneski, J. T., Jr. and D. W. Stinson. 1987. *Sorex palustris*. *Mammalian Species* 296:1-6.
- Bisbal E., F. J. 1986. Food habits of some neotropical carnivores in Venezuela (Mammalia, Carnivora). *Mammalia* 50:329-340.
- Bothma, J. D. P. 1966. Notes on the stomach contents of certain Carnivora (Mammalia) from the Kalahari Gemsbok Park. *Koedoe* 9:37-39.
- Buss, I. O. 1961. Some observations on food habits and behavior of the African Elephant. *Journal of Wildlife Management* 25:131-148.
- Carraway, L. N., L. F. Alexander, and B. J. Verts. 1993. *Scapanus townsendii*. *Mammalian Species* 434:1-7.
- Charles-Dominique, P. 1974 Ecology and feeding behaviour of five sympatric lorises in Gabon. Pages 131-150 in G. A. D. R. D. Martin, and A. C. Walker, editor. *Prosimian Biology*. University of Pittsburgh Press, Pittsburgh, PA.



- Cleary, G. P., L. A. L. Corner, J. O. Keeffe, and N. M. Marples. 2011. Diet of the European badger *Meles meles* in the Republic of Ireland: A comparison of results from an analysis of stomach contents and rectal faeces. *Mammalian Biology - Zeitschrift für Säugetierkunde* 76:470-475.
- Davies, R. A. G., P. Botha, and J. D. Skinner. 1986. Diet selected by springbok *Antidorcas marsupialis* and Merino sheep *Ovis aries* during a Karoo drought. *Transactions of the Royal Society of South Africa* 46:165-176.
- Dunham, K. M. 1980. The diet of impala *Aepyceros melampus* in the Sengwa Wildlife Research Area, Rhodesia. *Journal of Zoology* 192:41-57.
- Ellis, B. A., J. N. Mills, G. E. Glass, K. T. McKee, Jr., D. A. Enria, and J. E. Childs. 1998. Dietary habits of the common rodents in an agroecosystem in Argentina. *Journal of Mammalogy* 79:1203-1220.
- Emmons, L. H. 1980. Ecology and resource partitioning among nine species of African rain forest squirrels. *Ecological Monographs* 50:31-54.
- Fielden, L. J., M. R. Perrin, and G. C. Hickman. 1990. Feeding ecology and foraging behaviour of the Namib Desert golden mole, *Eremitalpa granti namibensis* Chrysochloridae. *Journal of Zoology* 220:367-389.
- Flannery, T. F. and P. Schouten. 1994. Possums of the world: a monograph of the Phalangerioidea. GEO Productions in association with the Australian Museum.
- Funmilayo, O. 1979. Food consumption preferences and storage in the mole *Talpa europaea*. *Acta Theriologica* 24:379-390.
- Gautier-Hion, A., L. H. Emmons, and G. Dubost. 1980. A comparison of the diets of three major groups of primary consumers of Gabon primates, squirrels and ruminants. *Oecologia* 45:182-189.
- Gray, G. G. and C. D. Simpson. 1980. *Ammotragus lervia*. *Mammalian Species* 144:1-7.

- Gregor, D. H., Jr. 1980. Diet of the little hairy armadillo, *Chaetophractus vellerosus*, of northwestern Argentina. *Journal of Mammalogy* 61:331-334.
- Guillotin, M., G. Dubost, and D. Sabatier. 1994. Food choice and food competition among the three major primate species of French Guiana. *Journal of Zoology* 233:551-579.
- Hahus, S. C. and K. G. Smith. 1990. Food habits of *Blarina*, *Peromyscus*, and *Microtus* in relation to an emergence of periodical cicadas *Magicicada*. *Journal of Mammalogy* 71:249-252.
- Hallett, J. G. 1978. *Parascalops breweri*. *Mammalian Species* 98:1-4.
- Heath, M. E. 1995. *Manis crassicaudata*. *Mammalian Species* 414:1-4.
- Hemming, C. F. 1972. The South Turkana Expedition: scientific papers. VIII. The ecology of South Turkana: a reconnaissance classification. *Geographical Journal* 138:15-40.
- Hockman, J. G. and J. A. Chapman. 1983. Comparative feeding habits of red foxes *Vulpes vulpes* and gray foxes *Urocyon cinereoargenteus* in Maryland. *American Midland Naturalist* 110:276-285.
- Jackson, K. L. a. W., P. A. 1992. The diet of five species of New Guinean rodents. *Science in New Guinea* 19:77-86.
- Kerley, G. I. H. 1992. Trophic status of small mammals in the semi-arid Karoo, South Africa. *Journal of Zoology* 226:563-572.
- Klare, U., J. F. Kamler, and D. W. Macdonald. 2011. The bat-eared fox: a dietary specialist? *Mammalian Biology - Zeitschrift für Säugetierkunde* 76:646-650.
- Koontz, F. W. and N. J. Roeper. 1983. *Elephantulus rufescens*. *Mammalian Species* 204:1-5.

- Langham, N. 1983. Distribution and ecology of small mammals in three rain forest localities of Peninsula Malaysia with particular references to Kedah Peak. *Biotropica* 15:199-206.
- Leirs, H., R. Verhagen, W. Verheyen, and M. R. Perrin. 1995. The biology of *Elephantulus brachyrhynchus* in natural miombo woodland in Tanzania. *Mammal Review* 25:45-49.
- Long, C. A. 1974. *Microsorex hoyi* and *Microsorex thompsoni*. *Mammalian Species* 33:1-4.
- McNab, B. K. 1995. Energy expenditure and conservation in frugivorous and mixed-diet carnivorans. *Journal of Mammalogy* 76:206-222.
- Meserve, P. L. 1981. Trophic Relationships among small mammals in a Chilean semiarid thorn scrub community. *Journal of Mammalogy* 62:304-314.
- Meserve, P. L., B. K. Lang, and B. D. Patterson. 1988. Trophic relationships of small mammals in a Chilean temperate rainforest. *Journal of Mammalogy* 69:721-730.
- Meserve, P. L., R. E. Martin, and J. Rodriguez. 1983. Feeding ecology of two Chilean caviomorphs in a central Mediterranean savanna. *Journal of Mammalogy* 64:322-325.
- Monadjem, A. 1997. Stomach contents of 19 species of small mammals from Swaziland. *South African Journal of Zoology* 32:23.
- Newsome, A., L. Corbett, P. Catling, and R. Burt. 1983. The feeding ecology of the dingo. 1. Stomach contents from trapping in south-eastern Australia, and the non-target wildlife also caught in dingo traps. *Wildlife Research* 10:477-486.
- O'Shea, T. J. 1991. *Xerus rutilus*. *Mammalian Species* 370:1-5.
- Owen, J. G. 1984. *Sorex fumeus*. *Mammalian Species* 215:1-8.

- Perrin, M. R., E. R. Dempster, and C. T. Downs. 1999. *Gerbillurus paeba*. Mammalian Species 606:1-6.
- Perrin, M. R., and L. J. Fielden. 1999. *Eremitalpa granti*. Mammalian Species 629:1-4.
- Reichman, O. J. 1975. Relation of desert rodent diets to available resources. Journal of Mammalogy 56:731-751.
- Ruiz-Olmo, J., López-Martín, J. M. . 1996 Seasonal food of pine marten *Martes martes* L., 1758 in a fir forest of Pyrenean mountains Northeastern Spain In: Mathias, M. L., Santos-Reis, M., Amori, G., Libois, R., Mitchell-Jones, A., Saint-Girons, M.C. Eds.. Proceedings of the I European Congress of Mammalogy. Lisboa , Portugal: 189-196.
- Sato, Y., T. Mano, and S. Takatsuki. 2005. Stomach contents of brown bears *Ursus arctos* in Hokkaido, Japan. Wildlife Biology 11: 133-144.
- Schmidly, D. J. 1974. *Peromyscus attwateri*. Mammalian Species 48:1-3.
- Sowls, L. K. 1997. Javelinas and Other Peccaries: Their Biology, Management, and Use. Texas A&M University Press.
- Tevis, L., Jr. 1953. Stomach contents of chipmunks and mantled squirrels in northeastern California. Journal of Mammalogy 34: 316-324.
- Torres-Mura, J. C., M. L. Lemus, and L. C. Contreras. 1989. Herbivorous specialization of the South American desert rodent *Tympanoctomys barrerae*. Journal of Mammalogy 70:646-648.
- Varty, N. 1990. Ecology of the small mammals in the riverine forests of the Jubba Valley, Southern Somalia. Journal of Tropical Ecology 6:179-189.
- Vernes, K. 1995. The diet of the red-legged pademelon *Thylogale stigmatica* Gould (Marsupialia : Macropodidae) in fragmented tropical rainforest, north Queensland, Australia. Mammalia 59: 517-526.
- Whitaker, J. O., Jr. 1963. Food, habitat and parasites of the woodland jumping mouse in central New York. Journal of Mammalogy 44: 316-321.

- Whitaker, J. O., Jr. 1966. Food of *Mus musculus*, *Peromyscus maniculatus bairdi* and *Peromyscus leucopus* in Vigo County, Indiana. *Journal of Mammalogy* 47: 473-486.
- Whitten, J. E. J. 1981. Ecological separation of three diurnal squirrels in tropical rainforest on Siberut Island, Indonesia. *Journal of Zoology* 193: 405-420.
- Wydeven, P. R. and R. B. Dahlgren. 1982. A comparison of prairie dog stomach contents and feces using a microhistological technique. *Journal of Wildlife Management* 46: 1104-1108.

## ELECTRONIC SUPPLEMENTARY MATERIAL 2

| <b>Feeding categories</b> | <b>Feeding resources</b>                 |
|---------------------------|------------------------------------------|
| Seeds                     | Seeds and their tissues                  |
| Invertebrates             | Arthropods, worms and molluscs           |
| Vertebrates               | Vertebrate animals                       |
| Fungi                     | Fungi and lichens                        |
| Flowers & Gum             | Flowers and gum                          |
| Roots & Tubers            | Roots and tubers                         |
| Green Plants              | Angiosperm leaves and branches and ferns |
| Fruit                     | Fruits and their tissues                 |

Feeding resources considered in each of the feeding categories

### ELECTRONIC SUPPLEMENTARY MATERIAL 3

**Importance of components:**

|                        | Comp.1 | Comp.2 | Comp.3 | Comp.4 | Comp.5 | Comp.6 | Comp.7 | Comp.8 |
|------------------------|--------|--------|--------|--------|--------|--------|--------|--------|
| Standard deviation     | 1.241  | 1.180  | 1.098  | 1.041  | 0.991  | 0.945  | 0.919  | 0.000  |
| Proportion of Variance | 0.194  | 0.175  | 0.152  | 0.136  | 0.124  | 0.112  | 0.106  | 0.000  |
| Cumulative Proportion  | 0.194  | 0.369  | 0.521  | 0.658  | 0.781  | 0.894  | 1.000  | 1.000  |

**Loadings:**

| Feeding resources | Comp.1 | Comp.2 | Comp.3 | Comp.4 | Comp.5 | Comp.6 | Comp.7 | Comp.8 |
|-------------------|--------|--------|--------|--------|--------|--------|--------|--------|
| Seeds             | 0.241  | 0.436  | -0.328 | -0.33  | 0.626  |        |        | -0.369 |
| Invertebrates     | -0.691 | 0.235  | 0.174  | 0.122  |        | 0.35   | 0.148  | -0.527 |
| Fungi             |        |        | -0.611 | 0.145  | -0.438 |        | -0.609 | -0.174 |
| Vertebrate        |        | -0.17  |        | -0.828 | -0.422 | -0.15  |        | -0.267 |
| Flowers and gum   |        | -0.166 | -0.604 | 0.168  |        | -0.217 | 0.715  | -0.11  |
| Roots and tubers  | -0.339 | 0.179  | 0.163  | 0.117  |        | -0.888 | -0.139 |        |
| Green plants      | 0.579  | 0.272  | 0.296  | 0.324  | -0.365 |        | 0.129  | -0.488 |
| Fruit             |        | -0.767 |        | 0.152  | 0.309  |        | -0.214 | -0.483 |

Importance of the components and loadings of the variables based on a principal component analysis of the stomach content data for the 139 species in this study.
